# Supplementary material
Source: PubMed Central journal article supplement (PMC5215065)
Supplement: NIHMS818745-supplement-Acknowledgment_Permissions.pdf [file NIHMS818745-supplement-Acknowledgment_Permissions.pdf]

## Circulation Research

---

**From:** Shalaurova, Irina <shalai@labcorp.com>  
**Sent:** Tuesday, September 06, 2016 8:58 AM  
**To:** circulation.research@circresearch.com  
**Subject:** permission to be acknowledged

I, Irina Shalaurova, MD, PhD, give my permission to be acknowledged by the group of authors (below) in the manuscript submitted to Circulation Research.

**Title:** GlycA is a Novel Biomarker of Inflammation and Subclinical Cardiovascular Disease in Psoriasis

**Authors:**

Aditya Joshi  
Joseph Lerman  
Tsion Aberra  
Mehdi Afshar  
Heather Teague  
Justin Rodante  
Parasuram Krishnamoorthy  
Qimin Ng  
Tarek Aridi  
Taufiq Salahuddin  
Balaji Natarajan  
Benjamin Lockshin  
Mark Ahlman  
Marcus Chen  
Daniel Rader  
Muredach Reilly  
Alan Remaley  
David Bluemke  
Martin Playford  
Joel Gelfand  
Nehal Mehta

Irina Shalaurova, MD, PhD  
LabCorp.Inc./LipoScience  
Staff Scientist II  
(919)256-1127  
shalai@labcorp.com

-This e-mail and any attachments may contain CONFIDENTIAL information, including PROTECTED HEALTH INFORMATION. If you are not the intended recipient, any use or disclosure of this information is STRICTLY PROHIBITED; you are requested to delete this e-mail and any attachments, notify the sender immediately, and notify the LabCorp Privacy Officer at [privacyofficer@labcorp.com](mailto:privacyofficer@labcorp.com) or call (877) 23-HIPAA / (877) 234-4722.

## Circulation Research

---

**From:** Otvos, James <otvosj@labcorp.com>  
**Sent:** Friday, September 02, 2016 4:49 PM  
**To:** circulation.research@circresearch.com  
**Subject:** CIRCRES/2016/309637R1 acknowledgement permission

I give my permission to be acknowledged in the above-referenced manuscript.

James Otvos, PhD  
Strategic Research Director  
LipoScience NMR Diagnostics  
2500 Sumner Blvd, Raleigh NC 27616

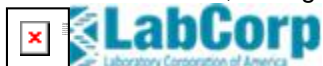

Adj. Prof. Molecular & Structural Biochemistry, NC State Univ.  
Adj. Prof. Medicine, UNC-Chapel Hill  
(919) 256-1123 (direct)  
[otvosj@labcorp.com](mailto:otvosj@labcorp.com)

-This e-mail and any attachments may contain CONFIDENTIAL information, including PROTECTED HEALTH INFORMATION. If you are not the intended recipient, any use or disclosure of this information is STRICTLY PROHIBITED; you are requested to delete this e-mail and any attachments, notify the sender immediately, and notify the LabCorp Privacy Officer at [privacyofficer@labcorp.com](mailto:privacyofficer@labcorp.com) or call (877) 23-HIPAA / (877) 234-4722.
